1

2 **Nothing without connection” – participant perspectives and experiences of**  
3 **mentorship in capacity building in Timor-Leste**

4

5 **Authors**

6 Jennifer Yan<sup>1,2</sup>, Nelson Martins<sup>1</sup>, Salvador Amaral<sup>1</sup>, Joshua R Francis<sup>1</sup>, Barbara  
7 Kameniar<sup>2,3</sup>, Clare Delany<sup>2</sup>

8

9 **Affiliations**

10 <sup>1</sup>Global and Tropical Health Division, Menzies School of Health Research, Charles  
11 Darwin University, Dili, Timor-Leste

12 <sup>2</sup>The University of Melbourne, Melbourne, Australia

13 <sup>3</sup>The University of Tasmania, Hobart, Australia

14

15

16

17

18

19

20

1

## 21 Abstract

### 22 Background

23 The literature on mentorship approaches to capacity building in global health is  
24 limited. Likewise, there are few qualitative studies that describe mentorship in  
25 capacity building in global health from the perspective of the mentors and mentees.

26

### 27 Methods

28 This qualitative study examined the perspectives and experiences of participants  
29 involved in a program of health capacity building in Timor-Leste that was based on a  
30 side-by-side, in-country mentorship approach. Semi-structured interviews were  
31 conducted with 23 participants (including Timorese and Australian mentors, and local  
32 Timorese counterparts) from across a range of professional health disciplines,  
33 followed by a series of member checking workshops. Findings were reviewed using  
34 inductive thematic analysis. Participants were included in review and refinement of  
35 themes.

36

### 37 Results

38 Four major themes were identified: the importance of trust and connection within the  
39 mentoring relationship itself; the side-by-side nature of the relationship (akompañã);  
40 mentoring in the context of external environmental challenges; and the need for the  
41 mentoring relationship to be dynamic and evolving, and aligned to a shared vision  
42 and shared goals.

43

## 44 **Discussion**

45 The importance of accompaniment (akompañá) as a key element of the mentoring  
46 relationship requires further exploration and study. Many activities in global health  
47 capacity building remain focused on provision of training, supervision, and supportive  
48 supervision of competent task performance. Viewed through a decolonising lens,  
49 there is an imperative for global health actors to align with local priorities and goals,  
50 and work alongside individuals supporting them in their vision to become  
51 independent leaders of their professions. We propose that placing mentoring  
52 relationships at the centre of human resource capacity building programs  
53 encourages deep and transformative learning, and is more likely to lead to long term,  
54 meaningful and sustainable change.

55

56

## 57 **Keywords**

58 Mentor, global health, capacity building, human resources, cross-cultural, resource-  
59 limited setting, qualitative research, Timor-Leste

## 60 Introduction

61 Despite progress worldwide to improve provision of health care, reduce infant and  
62 child mortality, and improve life expectancy and living standards, significant  
63 disparities continue to exist in the quality of health services available, and resultant  
64 health outcomes between different countries. Global health capacity building work  
65 often involves the provision of financial support and technical assistance from well-  
66 resourced settings to less well-resourced settings, through initiatives designed to  
67 build skills and capacity of the health workforce in order to strengthen the quality of  
68 health systems and improve health care delivery.

69

70 Strategies utilised for human resource capacity building in global health are many  
71 and varied, with examples of overseas training, intensive in-country support, short  
72 course training or workshops, and supervision and mentoring for short stints that  
73 may be one-off or with recurring follow-up of variable frequency (1–13). In-country  
74 training and supervision may be conducted in-situ with existing work teams or with  
75 selected staff only in a centralised location, or even remotely via email or phone.

76

77 The method and mode of capacity building education has impacts on the quality of  
78 the learning and subsequent sustainability of that learning for the individual and the  
79 broader health service. Different techniques for teaching and delivering content have  
80 implications for the promotion of superficial or deep learning, rote learning versus  
81 critical thinking, and successful application from theory to practice (14–17). For  
82 example, individuals receiving overseas training in more developed settings may

83 experience a sense of great internal transformation and learning, but struggle to  
84 troubleshoot and overcome barriers to change as a solo change agent on returning  
85 to their own country context and workplace, where they may be faced with very  
86 different issues to those encountered during their training (12,13). Short course  
87 trainings or workshops may be less likely to lead to sustained changes in  
88 performance in the absence of ongoing support and provision of feedback and  
89 follow-up (7,16–20). Remote mentoring and supervision offers flexibility, but can be  
90 limited by unreliable access to phone and internet connectivity and greater  
91 challenges in developing relationships, avoiding miscommunication, and adapting  
92 advice and educational materials to the local context, particularly when parties come  
93 from different cultural backgrounds (12,21).

94

95 The concept of mentorship is one that is well accepted in the educational literature.  
96 The mentor is compared to an advisor or guide, with two way communication and  
97 mutual respect between mentor and mentee, and where the relationship is integral,  
98 not just for the transfer of information, but also as a means to inspire and guide to  
99 transformative learning (22,23). Though the concept of mentorship is well recognised  
100 in the field of education, the dominant focus in global health capacity building  
101 literature is on task performance and related supervision (1,2). Literature describing  
102 the use of mentorship is limited (1,2,6,8).

103

104 The theoretical underpinnings of the mentorship approach are, however, closely  
105 aligned to the concept of building capacity in a respectful, collaborative way, by

106 encouraging two-way learning and providing opportunities for the mentee grow and  
107 lead, not just to learn.

108

109 Published literature evaluating mentorship approaches in global health has favoured  
110 quantitative assessment and there are few qualitative studies of participant  
111 experience (3,24), particularly relating to mentorship in the cross-cultural setting (25–  
112 28). There is a need for more research into approaches that place international  
113 mentors into resource constrained settings and to identify the factors that contribute  
114 to, and impede, productive and successful mentoring relationships from the  
115 perspectives of both parties involved.

116

117 This research project describes participant experiences of a particular model of  
118 human resource capacity building involving intensive in-country, side-by-side  
119 mentorship with expatriate and local mentors in Timor-Leste.

120

121 Timor-Leste is located in South-East Asia, an island nation sharing a land border  
122 with Indonesia. Timor-Leste is a relatively young country, having achieved  
123 independence 20 years ago following Indonesian occupation and prior colonisation  
124 by the Portuguese (29). Timor-Leste lost approximately one-third of its population  
125 during almost three decades of conflict, along with its infrastructure, and a  
126 generation of leaders. Timor-Leste is considered a resource-constrained setting, and  
127 is ranked 140 out of 189 countries and territories on the Human Development Index  
128 (30). Much of the development that has occurred since independence, including the

129 rebuilding of a national health service and health workforce, has occurred with  
130 involvement of external development partners (31).

131

132 The Menzies School of Health Research (Menzies) is involved in delivering a  
133 program of capacity building, research and health system strengthening in Timor-  
134 Leste, working in partnership with the Government of Timor-Leste Ministry of Health,  
135 and Ministry of Agriculture and Fisheries, via projects funded primarily by the  
136 Australian and UK governments. Menzies is an Australian medical research institute  
137 dedicated to improving Indigenous, global and tropical health. The Menzies program  
138 of work in Timor-Leste has focused on strengthening the country's local health  
139 system capacity to recognise and respond to infectious diseases, which remain a  
140 major cause of morbidity and mortality (32–34). The work is centred around a  
141 program of intensive side-by-side mentorship with mentors (expatriate Australian and  
142 Timorese) working alongside local Timorese colleagues across a range of settings –  
143 laboratory, clinical and surveillance; and across a number of professional disciplines  
144 in human and animal health - involving doctors, nurses, public health staff, laboratory  
145 scientists and technicians, and veterinary staff. The support for human resource  
146 capacity building has occurred in conjunction with funding to support improvements  
147 in infrastructure, equipment and information management systems. Mentors are  
148 based in-country, situated in the workplace alongside their local counterparts, to  
149 exchange knowledge and skills, to model, guide, support, and help to troubleshoot  
150 application of skills into real life on-the-job practice. The mentorship approach used  
151 in this program was informed by theoretical concepts of mentorship from educational

152 literature and a growing understanding of the importance of decolonising global  
153 health.

154

155 Methods

### 156 [Methodological orientation and theoretical framework](#)

157 We took an interpretive phenomenological approach to this study. In order to centre  
158 participants' lived experiences, learning from, and with participants, we undertook a  
159 collaborative and iterative process of member checking – obtaining, checking and  
160 analysing, and drawing meaning from the data, together with participants.

161

### 162 [Study setting](#)

163 This study was conducted in Timor-Leste. It was designed to examine the  
164 mentorship approach of a program of work delivered by Menzies School of Health  
165 Research in partnership with the government of Timor-Leste.

166

167 The study was conducted between October 2020 and November 2022. Due to the  
168 COVID-19 global outbreak, the mode of mentorship delivery changed mid-program  
169 as a number of the mentors were unable to continue working in-country. These  
170 mentors returned to Australia and continued mentoring remotely. Other mentors  
171 were able to remain in-country as their work also involved direct support of the  
172 national COVID response. Two Timorese mentors returned to Timor-Leste  
173 specifically to support their country and the laboratory efforts at this time. We were



174 also interested to understand the impact of this change on mentors and mentees in  
175 their experience of the mentoring relationship.

176

## 177 Participant recruitment and data collection

178 We recruited participants who had experience of the Menzies program of work either  
179 as mentors or local colleagues. The terminology used by the program was of a  
180 mentor and their local colleague or counterpart, rather than 'mentee'. Potential  
181 participants were recruited by first displaying information regarding the study with  
182 flyers in the workplace, and mention of the research project at staff meetings,  
183 followed by an email distribution to potential participants and a message on a group  
184 messaging platform. We planned to undertake purposive sampling, to achieve a mix  
185 of participants across professional disciplinary areas and across mentors and  
186 mentees. Our initial aim was for 15-20 participants, but we had capacity to include all  
187 23 individuals who expressed interest to participate (8 mentors and 15 counterparts).

188

189 We first conducted a series of individual semi-structured interviews, in which we  
190 focused on participants' experiences and perspectives. We then held three follow-up  
191 group workshops with participants as part of a member checking process (described  
192 under data analysis). The majority of interviews were conducted in-person in a  
193 private mutually convenient location, with a few interviews conducted over online  
194 videocall. Interviews were planned to be 30-45 minutes in duration, however a  
195 number of interviews extended out to 60-90 minutes with participants keen to share  
196 their thoughts. Participants were offered the option of being interviewed in English,  
197 Tetun, or a combination of both. All interviews were audio-recorded. Interviews in

198 English were conducted by researcher JY. Interviews in Tetun were conducted by  
199 researchers NM and SA (fluent in both Tetun and English), and later transcribed  
200 verbatim and then translated from Tetun to English, with review of the accuracy of  
201 the translation by the research team, and opportunity provided for review,  
202 clarification and edits by the participant.

203

204 The research team met together on multiple occasions to review the audio  
205 recordings and transcripts and reflect on interviews as they were conducted,  
206 discussing approaches to encourage natural conversation and ensure participants  
207 felt comfortable to share their experiences honestly, including to provide negative  
208 feedback. This was predominantly achieved by revisiting the aims and intent of the  
209 research project at the beginning of each interview, sharing the motivation for  
210 conducting the research, and our desire to learn from and be guided by participant's  
211 experiences and suggestions for how things could be done better, in designing future  
212 mentorship and capacity building work.

213

214 The data collected included the audio recordings, transcripts and translations of the  
215 interviews, and also butcher's paper notes, video excerpts and photos from the  
216 'member checking' group participant meetings described below, recordings and  
217 translations of discussions, and notes, observations and reflections from discussions  
218 of the research team.

219

## 220 Data analysis

221 Transcripts were analysed and coded by the principal investigator JY and reviewed  
222 together with discussion of themes by JY, JF, NM and SA, with further discussion  
223 and development and refinement of themes with CD and BK. Participant quotes  
224 were coded numerically e.g. P3 for participant 3. Because of the small sample size  
225 and specificity of roles, a simple numbering system was used that does not  
226 distinguish nationality or role, for purposes of preserving anonymity.

227 Inductive thematic analysis was supported and supplemented by a process of  
228 member checking to ensure trustworthiness of the findings (35). This process of  
229 member checking involved three half-day meetings where research participants were  
230 invited to workshops to reflect upon and discuss key questions raised in the  
231 mentorship interviews. Participants were informed that these workshops were being  
232 conducted to provide a member checking process for the research data and analysis.  
233 The workshops also provided an opportunity for participants to share their  
234 experiences, learn more about mentorship, and help steer the organisation's  
235 direction in its approach to mentorship and ongoing capacity building initiatives.  
236 Participants consented to the data generated in these member checking workshops  
237 being included in the research. Through the member checking process, participants  
238 also contributed to the process of thematic analysis, reviewing and refining themes  
239 (35).

240 The methodology chosen was consciously collaborative and participatory, to identify  
241 the themes of greatest importance to the participant group as well as differing  
242 viewpoints, to limit the impact of views and assumptions imposed by the researchers,

243 and to provide participants a shared forum and pathway for their suggestions to be  
244 heard and influence the program's direction and implementation.

245

## 246 Ethics

247 Ethics approval was obtained from the Human Research Ethics Committee of the  
248 Northern Territory Department of Health and Menzies School of Health Research  
249 (HREC2020-3891) and Instituto Nacional de Saúde in Timor-Leste (1684MS-  
250 INS/GDE/X/2020). A participant information sheet was provided in Tetun and English  
251 and written informed consent obtained from all participants.

252

## 253 Results

254 There were 23 interviews conducted. These included 9 female and 14 male  
255 participants, and participants across human (n=18) and animal (n=5) health, from a  
256 range of professional disciplines including medical, nursing and pharmacy staff,  
257 laboratory scientists, surveillance and public health staff, veterinarians and veterinary  
258 technicians. There were six Australian and two Timorese mentors. A number of  
259 Timorese participants identified subsequently during the interviews with the roles of  
260 both mentor and mentee.

261

262 Participants' answers were frank. They shared both positive and negative  
263 experiences and acknowledged many nuances to the relationship and the mentoring

264 experience. Many participants wanted to continue the interviews over the allocated  
265 time, and to continue providing their thoughts and suggestions for improvement.

266

267 The most prominent theme from the study was the fundamental importance to  
268 participants of trust and genuine connection within the mentoring relationship itself,  
269 the foundation and centre from which deep engagement and transformative learning  
270 was able to take place. Other key themes included the side-by-side nature of the  
271 relationship (*akompañá*); mentoring in the context of external environmental  
272 challenges; and the need for the mentoring relationship to be dynamic and evolving,  
273 aligned to a shared vision and shared goals.

274

275 Mentors and their counterparts reflected on similar issues from different standpoints,  
276 and often their comments showed insight into the position of the other. There were  
277 no clear differences or trends across the professional disciplines in how mentorship  
278 was perceived, though experiences of mentoring relationships varied between  
279 individuals; the inclusion of a wide interdisciplinary group showed that the nature of  
280 mentorship was not specific to profession.

281

282 Theme 1: Importance of trust, and genuine connection in the mentoring

283 relationship - ‘nothing without connection’

284 The word connection was used often, and from this connection, participants

285 described potential for deeper engagement, an alignment and agreement to partner

286 along a path of development, and deeper rather than superficial learning.

287 *“Mentorship stuff is about personal approach... So, having someone working*

288 *closely with you, it gives you, I don't know, a positive aura. And also... like a*

289 *guarantee sort of way. Okay, I think I have someone who can help me to*

290 *achieve this. I think I have someone who has this background knowledge.*

291 *And I want to go there. And this is the someone. ‘Come with me.’” (P23)*

292

293 Participants across all areas spoke at length about the importance of the relationship,

294 recognised by mentors as well as local counterparts, as being necessary for learning,

295 motivation, and productive communication. Participants spoke of the necessity of

296 mentorship being not just a professional relationship but individual connection, and

297 of friendship (Figure 1).

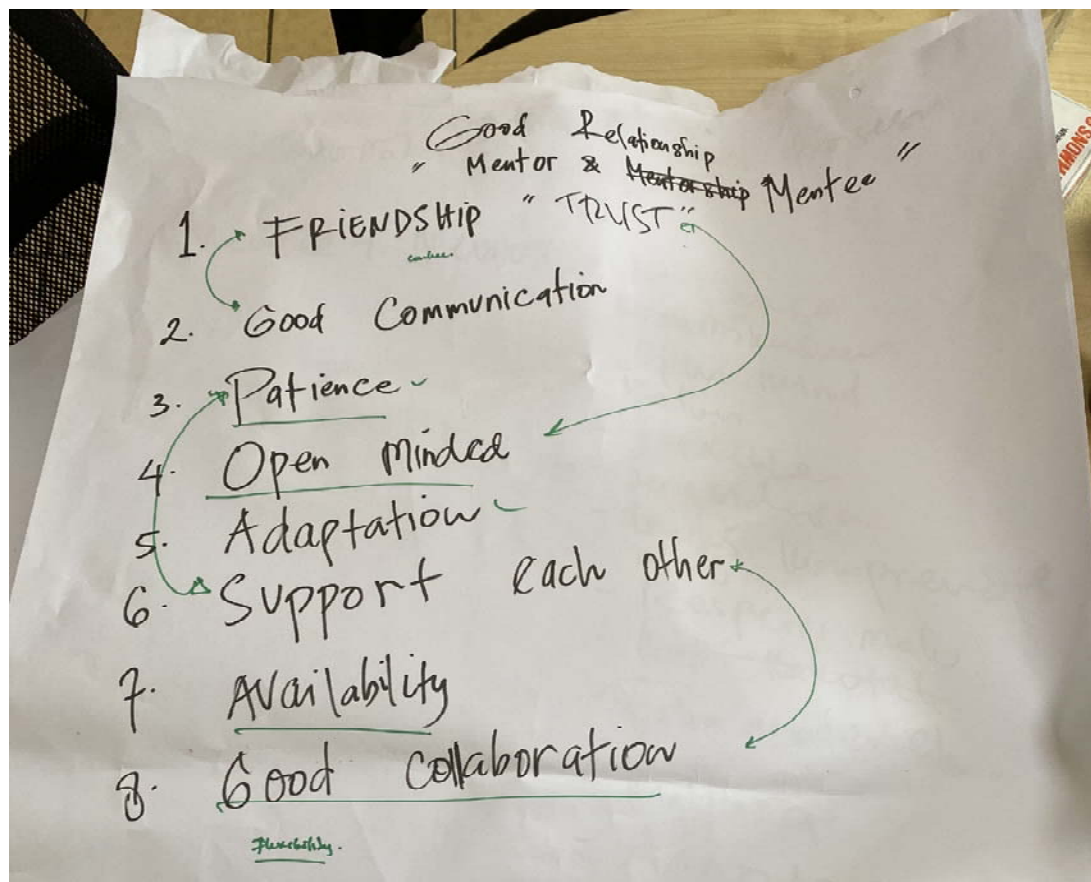

298

299 Fig 1. Example butcher's paper notes from group participant meeting on 'what makes a good relationship  
300 between mentor and mentee'

301

302 "There's no magic. Just making friends, eating food. The relationships are  
303 important... you don't tick them off, or sign off that the relationships are going  
304 well. That's not a, um, KPI or anything. Building relationships. But it's  
305 important." (P16)

306           *“Side-by-side... This type of relationship, there is more confidence... instead*  
307           *of you’re calling doctor, he can be like a brother, when you are too close,*  
308           *you’re able... you are sacrifice yourself to teach someone without return. I*  
309           *mean, without any payment. They respect you.” (P14)*

310

311 Participants spoke about experiences they had had in training and mentorship  
312 programs where this kind of relationship and adaptation to context was not present,  
313 and their frustrations, the impact on their learning, motivation, sense of self-worth  
314 and achievement.

315           *“Especially if you come and you are the one who orders, only orders, only to*  
316           *teach, we feel like we are being fooled so that sometimes obstructing... work*  
317           *does not go well.” (P8)*

318

319 Participants emphasised that the development of this connection takes time. It  
320 requires getting to know each other personally.

321           *“The first five or six months, there wasn’t a lot of output from my behalf, but*  
322           *the first third of the project was just establishing relationships... which is an*  
323           *important part of mentoring. If you take time to do that properly... what’s going*  
324           *on now has been an accumulation of a lot of background work over years and*  
325           *now it’s built to a crescendo where things are firing along”. (P16)*

326 In-person presence, in-place, in-country, working side by side, was how this  
327 developed. Mentors reflected on how much better they were able to support their



328 local colleagues once they had this trust and understood the contextual challenges.

329 They were then able to adapt their troubleshooting suggestions appropriately.

330

331 The Timorese participants very clearly requested that mentors stay for a year, and

332 ideally longer. In the group meetings, Timorese participants described the burden

333 placed on them when mentors changed frequently, sometimes every six months.

334 Adjusting to the new person and new personality, re-orientating another foreigner to

335 the peculiarities of the local context and cross-cultural differences, introducing them

336 to colleagues, and navigating stakeholder relationships were identified as challenges.

337 Individual mentors would come with slightly different ways of working, and different

338 suggestions, before coming to understand the context and history of what had come

339 before them.

340 *“These conditions make us feel stressed. Because what we have learnt from*

341 *first mentor is different, the second come different, the third mentor also*

342 *different. Sometime it’s difficult. After one mentor came and then another*

343 *mentor replaced with different system. I understand because even they are all*

344 *from Australia but they are from different hospital so sometimes it happened.”*

345 *(P7)*

346

347 Establishing deep trust required time. Once established though, the impact of this

348 trust on achieving a shared understanding was significant.

349 *“[x] is quite honest with me. So I get the real story behind things rather than*

350 *the official story, or the story at face value.” (P16)*

351

352 The key finding from this study, then, was the importance of trust and connection in  
353 the mentoring relationship, and that this trust and connection takes time and needs  
354 to take place *in situ*. Participants reflected on the impact of the mentoring  
355 relationships on the broader program of work.

356 *“It’s the glue that held it together that actually made it work. If it’s not for those*  
357 *mentor relationships, we wouldn’t have pulled this off. These machines would*  
358 *have sat in isolation and not been used, and the technology wouldn’t have*  
359 *been incorporated... the understanding of the people that are now going to*  
360 *have to take this on only works because of the mentoring relationship. It*  
361 *would have been nice to foster even more of that to be sure that it will live on.”*  
362 *(P17)*

363

## 364 Theme 2: The side-by-side nature of the relationship - “*akompañã*”

365 When asked what mentorship meant, Timorese participants reflected that there was  
366 no direct translation for the word mentor or mentorship into Tetun, the local language.  
367 Many participants used the word ‘*akompañã*’ to define their experience of  
368 mentorship, describing a sense of being accompanied, alongside, side-by-side,  
369 being motivated and supported by their mentor.

370 *“He is the one who always motivate us..” (P8)*

371 *“Like assisting with the things that we or mentor knows, the one that we do*  
372 *not know and to remind, motivate, give a good way the one who do not know,*  
373 *or to make it deeper to thing that already exist before..”(P11)*

374 *“More, contact, and to be side by side... I expect to have a mentor who works*  
375 *side by side with me.” (P14)*

376

377 This was reinforced in the group participant meetings. Timorese participants  
378 preferred this word ‘akompaña’ to another word ‘matadalan’ – also a word which  
379 means ‘to guide’, but importantly, used in a different sense of being guided ahead  
380 and following behind (rather than alongside), as one might have a guide to show you  
381 the path up a high mountain. This sentiment was also reflected by the mentors.

382 *“Well... you’ve got to build a bit of trust don’t you. It’s not like a teacher*  
383 *student relationship, like a superior inferior... is that what you call it? It’s a bit*  
384 *of... sort of side by side. It’s definitely not hierarchical, I’m the boss and they’re*  
385 *the student. Mentoring is side by side. They roll their sleeves up and... like in*  
386 *the lab, (working) on the bench... not just throwing advice from afar.” (P16)*

387

388 Both Australian and Timorese participants used similar language to describe the  
389 nature of the relationship, and it was clear that the concept of mentorship, with  
390 elements of mutual respect and two-way learning, translated across cultures.  
391 Australian mentors described needing and receiving *“a kind of cultural mentorship.”*  
392 *(P22)*

393

394 Participants reflected on the difference between this style of long-term, side-by-side  
395 mentorship and other models of teaching and training that they had previous  
396 experience of as either teachers or learners. Whilst recognising the role that lectures

397 and workshops could have in disseminating information to a large group of people,  
398 both mentors and local counterparts noted the limitations of the group setting on  
399 learners feeling able to ask questions, to have teaching pitched to the right level, and  
400 on translating knowledge or skills into practice. In the member checking workshops,  
401 some Timorese participants proposed that training modalities such as group lectures  
402 or workshops would be of greater value if they could be implemented alongside a  
403 follow-up schedule of regular, frequent visits for workplace-based training and  
404 support, and sharing of contact details for less formal and remote support between  
405 times. It was felt that this kind of set-up could utilise the benefits of mass information  
406 delivery while still then addressing an individual's specific learning needs – as long  
407 as there was a consistent mentor who they could develop a trusting relationship with  
408 over that time. These descriptions essentially articulated and added in key elements  
409 of support necessary to achieve the kind of accompaniment that they had  
410 experienced.

411

412 Participants valued the opportunity through mentorship for the local counterpart to  
413 actively direct their learning journey, and described a relevance and depth of  
414 learning, that was more difficult to achieve through other forms of training where  
415 learning is seen as unidirectional, teachers as active and learners as passive  
416 recipients of the 'wisdom' of the teacher. Such a disposition to teaching and learning  
417 reflects the colonial past of many new nations and is not only ineffective as a  
418 pedagogical approach, but also demeaning. Instead, mentorship as 'akompana'  
419 privileges the relationship as equal and different. It requires active listening,  
420 understanding, and responding (Table 1).

421 For participants, being 'side-by-side' was integral to the development and growth of  
422 the relationship itself. It also provided the context for teaching and learning through  
423 direct observation and feedback in the workplace. Participants expressed the  
424 strength of this situated learning approach as one of teaching through showing, and  
425 learning through doing, gaining apprenticeship not just of knowledge and skills, but  
426 of attitude, critical thinking and role modelling; and with the benefit of immediate  
427 application and adaptation to context. This kind of relationship required trust, and  
428 time to develop, and was considered a deeper and more personal relationship than  
429 that between teacher and learner, or with a regular work supervisor.

430 Table 1. Theme 2: The side-by-side nature of the relationship. Quotes illustrating the concept of “*akompañá*” and participant views on the benefits of this approach compared to  
 431 other experiences of teaching, training and supervision.

432

|                                                                                                                                                                                                                                                                                                                                                                                                                                                                                                                                                                                                                                                                                                                                                                                                                                                                                                                                                                                                                                                                   |
|-------------------------------------------------------------------------------------------------------------------------------------------------------------------------------------------------------------------------------------------------------------------------------------------------------------------------------------------------------------------------------------------------------------------------------------------------------------------------------------------------------------------------------------------------------------------------------------------------------------------------------------------------------------------------------------------------------------------------------------------------------------------------------------------------------------------------------------------------------------------------------------------------------------------------------------------------------------------------------------------------------------------------------------------------------------------|
| <b>From the mentors</b>                                                                                                                                                                                                                                                                                                                                                                                                                                                                                                                                                                                                                                                                                                                                                                                                                                                                                                                                                                                                                                           |
| <i>I see myself as not just teaching or showing the right way to do things, but also showing them our approach, showing them the attitudes and showing them the character of embracing and knowledge sharing and not holding back. (P23)</i>                                                                                                                                                                                                                                                                                                                                                                                                                                                                                                                                                                                                                                                                                                                                                                                                                      |
| <i>The mentoring relationship is ‘what don’t you know? What do you want to know?’ There’s a lot more questions and it requires the mentee to come into the relationship to fill their knowledge gaps and to think and to start questioning themselves about what they don’t understand and what they want to advance on. (P17)</i>                                                                                                                                                                                                                                                                                                                                                                                                                                                                                                                                                                                                                                                                                                                                |
| <i>I think that’s a very important aspect of mentoring, that it’s bi-directional and getting the questions back and establishing the hunger for knowledge as well. (P17)</i>                                                                                                                                                                                                                                                                                                                                                                                                                                                                                                                                                                                                                                                                                                                                                                                                                                                                                      |
| <i>You sit side-by-side with someone and you understand where they’re coming from; you understand their background; you understand their limitations in language or in learning and past experiences and you adapt the teaching model to that particular individual and then you have immediate feedback on whether there’s an understanding or a learnt concept. It embeds it.. it embeds it properly and you can adapt what you’re doing to each person. I think that model... side-by-side mentoring, which is picking up on holes immediately when they’re seen and not just a PowerPoint which apparently covers everything that you’re ever supposed to know on that particular topic done in an hour: blasted and never checked again, is the difference. To try and understand what the learners need and want. To go at the pace of the learners and to pick up on ad hoc, opportunistic moments where it’s obvious that the learner doesn’t quite understand and to feed into those at the point where it’s going to be most useful for them. (P17)</i> |
| <i>The first thing for a mentor is to listen and to watch and to understand: understand the system; understand the person; understand the limitations and understand what’s going on culturally, socially, as well, in that setting. So you can formulate whatever training and whatever response is necessary based on those things. (P17)</i>                                                                                                                                                                                                                                                                                                                                                                                                                                                                                                                                                                                                                                                                                                                   |
| <i>We care about the individual and the individual that we’re training may or may not grasp the third step in that seventeen step process and so therefore we need to spend a lot more time on that third step. So there’s this adaptable, person-centred approach. (P17)</i>                                                                                                                                                                                                                                                                                                                                                                                                                                                                                                                                                                                                                                                                                                                                                                                     |
| <b>From their local counterparts</b>                                                                                                                                                                                                                                                                                                                                                                                                                                                                                                                                                                                                                                                                                                                                                                                                                                                                                                                                                                                                                              |
| <i>They will always be available to accompany, not as formal, we can ask them questions. For mentorship we feel very close. If there is a questions we will feel free to ask, and if there is on the job training, will be shows directly. (P9)</i>                                                                                                                                                                                                                                                                                                                                                                                                                                                                                                                                                                                                                                                                                                                                                                                                               |
| <i>The one I like the most, is when they came, they asked first, and understand in which part we were weak and wrong, and then observed it, and then they follow [up] one by one. (P9)</i>                                                                                                                                                                                                                                                                                                                                                                                                                                                                                                                                                                                                                                                                                                                                                                                                                                                                        |
| <i>So we felt that there always someone available to backing us up. Even though we felt something really and hard and difficult and many things that we do not know but when we feel that they are standing behind, we feel fine, and confident. (P9)</i>                                                                                                                                                                                                                                                                                                                                                                                                                                                                                                                                                                                                                                                                                                                                                                                                         |
| <i>When he gives feedback, he gives an opinion regarding our work, he wouldn’t make that we felt shy or feel embarrassed or something, so I personally never feel like that, even when we did something not right, he will be talking to us in a good way. I like him because he doesn’t make us feel inferior. (P3)</i>                                                                                                                                                                                                                                                                                                                                                                                                                                                                                                                                                                                                                                                                                                                                          |
| <i>The one that went well was the flexibility. If we feel uncomfortable, we can speak up, if we have an opinion he encourages to speak up. (P1)</i>                                                                                                                                                                                                                                                                                                                                                                                                                                                                                                                                                                                                                                                                                                                                                                                                                                                                                                               |
| <i>To be useful in mentorship, teaching someone by doing it is very useful. Not, not just theory, and then this is not useful. It’s very wonderful working with them. (P14)</i>                                                                                                                                                                                                                                                                                                                                                                                                                                                                                                                                                                                                                                                                                                                                                                                                                                                                                   |
| <i>You mentor.. guiding them to achieve an objective... So, you need to accompany them step by step process. You should keep guiding and if they give up you should bring them up, should keep helping them, keep backup until they achieve the goals that we want. Keep accompany them, improving, developing them. (P5)</i>                                                                                                                                                                                                                                                                                                                                                                                                                                                                                                                                                                                                                                                                                                                                     |
| <i>There is a relation with mentor. We accompany. With mentor and mentees. It means that mentor giving assistance to mentees to do some works in order to achieve his or her objective. (P2)</i>                                                                                                                                                                                                                                                                                                                                                                                                                                                                                                                                                                                                                                                                                                                                                                                                                                                                  |

433

434 However, there were times when language barriers impacted effective  
435 communication and therefore the ability to effectively work alongside, and build  
436 a trusting, two-way relationship between mentors and their local counterparts.  
437 One of the Australian mentors was fluent in Tetun; the others lamented that  
438 they had not learnt more of the local language. Many of the Timorese  
439 participants interviewed had developed their English skills over time, whereas  
440 others had limited English, and were therefore impacted to different degrees.  
441 Participants reflected on the impact of different levels of language ability and  
442 the unintended effects this could have of limiting the potential of a mentoring  
443 relationship, excluding some people in a group from learning, or creating  
444 hierarchies of knowledge and access, or perceived favouritism within a group.

445 *“Colleagues were complaining us because they felt we that having no*  
446 *barrier to the language are the one more close to the mentor, that is why*  
447 *they take some distance because they feel it is unfair to them. So they*  
448 *feel that the mentor just want to teach only the good one, that is why the*  
449 *colleagues did not want to learn because of the language barrier.” (P9)*

450 *“We have limitation (in language) but doesn’t mean we don’t (want to)*  
451 *know, we try our best to learn. As I said, language is limiting us to ask*  
452 *more.” (P7)*

453 Mentors were very aware of the issue.

454 *“The people that are understanding a lot of the mentoring and are part of*  
455 *the continuous mentoring relationship are the ones that have the most*  
456 *proficient English. Others unfortunately aren’t as progressed within the*  
457 *mentoring relationship because of the language difficulty barriers —*

458 *they're still part of the mentoring process, but the advances that you can*  
459 *make are limited by that. We've tried not to ignore them at any step, but*  
460 *they're not engaged and it's purely a language thing, the mentoring*  
461 *relationship, because the language isn't translated across. It forms teams;*  
462 *you don't want to have this little, secret mentoring group over here where*  
463 *they find out all the information, whereas the other group doesn't find out*  
464 *the information." (P17)*

465

466 Participants recognised nuance in the relationships too, and the influence of  
467 individual personalities on the success of mentorship. Attributes of a good  
468 mentor were described as being open, approachable, available, flexible, patient  
469 and humble. Timorese counterparts saw that a willingness to be open, ask,  
470 questions, and accept new knowledge were important characteristics in order to  
471 make the most from the mentoring relationship. Participants described the  
472 contrast between an effective mentoring relationship, and other workplace  
473 relationships where knowledge may be held as power, instead of shared.

474

475 Some participants had worked alongside different mentors, and a few reported  
476 variable experiences. Those with less positive mentorship experiences  
477 described lacking strong connection, or wishing that their mentor had provided  
478 more training and support, like they saw others receiving. Contributing factors  
479 raised included different personalities and approaches to communication, a  
480 different understanding of what the mentoring relationship was to involve,  
481 language barriers, and lack of time.



482

483 Participants felt that the best chance of ensuring good mentoring relationships  
484 would be through careful selection of mentors with personal qualities that would  
485 be a 'good fit' not just for mentorship but for working cross-culturally, orientation  
486 to the role for both parties with description of intended approach and  
487 expectations of mentorship, maintaining the individualised nature of support  
488 through regular daily informal communication, regular discussions (less  
489 frequently) to reassess goals, and informal peer support of new mentors and  
490 mentees through regular group catch ups. This (the current approach) was  
491 supported and preferred over adoption of a more formal process using written  
492 mentorship agreements or mentorship plans, or a 'one size fits all' approach.

493

### 494 Theme 3: Mentoring in the context of external environmental challenges

495 Many participants mentioned challenges outside of the mentoring relationship;  
496 structural limitations that constrained their operating environment and impacted  
497 on what mentoring and support of an individual could achieve. Within country,  
498 participants expressed having limited power to effect change within a workplace  
499 without buy-in and leadership from supervisors and leaders within the  
500 government structures, including when shifts in leadership result in changing  
501 agendas and the need to establish new relationships.

502 *"It's obviously clouded so much in Timor by the political nuances, the*  
503 *different political groups, which I still don't quite understand and those*  
504 *divisions which most Timorese people utterly stand by creates conflicts*

505 *behind the scenes that you don't understand. But trying to communicate*  
506 *with all different stakeholders... it just can't be done enough.*

507 *Having communication and creating communication channels with these*  
508 *people (in senior roles) is just so essential to success in anything. And*  
509 *not maintaining that can mean that you find doing things (not meaning*  
510 *the mentoring relationship) later on are difficult and remain hard.” (P17)*

511 Limitations of government budget also constrain available spending.

512 *“The government has no money. Each year when budget comes and*  
513 *there is available budget then we can move a bit... but after finished then*  
514 *we also stop, so it's hard. We are working together with partners from*  
515 *[lists institutions], they sometimes come and help.” (P11)*

516 Other environmental factors can also influence success, especially if mentoring  
517 and training is not paired with corresponding investment in infrastructure,  
518 equipment or logistical support for people to be able to do their jobs well.

519 Projects are limited by the interests and requirements of grant funders, and by  
520 short funding timelines, though an approach centred on mentorship could  
521 contribute to longer term sustainability beyond project end.

522 *“It's hard with the way things are funded, like [project] is a ridiculous*  
523 *amount of money in a short time, it doesn't allow for a lot of.. like, you*  
524 *can't lock in mentoring. Longer term funding cycles are probably much*  
525 *better for this sort of [mentorship] thing, they lock in a bit of stability and*  
526 *longevity. I mean, part of the thing is recognizing that [if] the funding only*  
527 *goes for so long, that then when people develop a relationship, you still*

528 *carry on supporting someone, regardless of whether there's money or*  
529 *not.” (P16)*

530

531 Additionally, the global COVID pandemic led to unavoidable changes in  
532 mentorship arrangements; restrictions on overseas travel of Australian citizens  
533 meant many Australian mentors had to leave Timor-Leste and change from  
534 working in-country to supporting remotely. This had a variable impact on their  
535 Timorese counterparts, depending on their level of skill and experience, their  
536 need for close supervision and hands on input, and the closeness of the pre-  
537 existing mentor relationship. Once the relationship was well established, online  
538 communication could still be effective, but remote mentorship was not the same  
539 as being there in person. For some, who felt ready and were competent to work  
540 independently, the distance worked well in clearly transitioning task ownership  
541 and responsibility, whilst still having regular frequent contact allowing them to  
542 feel supported and able to ask questions when needed. These participants  
543 identified advantages and disadvantages: of stepping up and not becoming  
544 dependent on the mentor’s presence and contribution to workload and decision  
545 making, but also losing the benefits of having their mentor by their side.

546 *“So at that time when we need something he directly responding, not*  
547 *even five minutes he quickly responding, so he is also doing video call,*  
548 *we also taking picture and sent him to have a look.. (but) when we need*  
549 *something that we do not yet understand, there is no one come to help*  
550 *for hands on to show.” (P1)*

551

552 For others, it was difficult for distance not to change the interaction with their  
553 mentor, the frequency of communication and sense of being able to ask for  
554 support.

555 *“The distance is making it difficult for me to have contact with my mentor.*  
556 *Well I think it is different. We have a doubt, we will not text it, through the*  
557 *email.. making subsequent questions.. so maybe big doubt, big*  
558 *confusion I will ask, but just asking questions... When we are close by,*  
559 *privately, I can ask you silly questions when we are close.. but [mentor]*  
560 *in Australia and me in Timor is difficult. Yeah I am not bothering them*  
561 *with my silly questions. Have to be big questions.” (P14)*

562

563 The experience of the participant above highlights how the side-by-side nature  
564 of the relationship was important both physically and metaphorically. Despite a  
565 relationship that had built over time, and occurred in situ, the strength of the  
566 established relationship was challenged and in this instance, disrupted by  
567 distance. This participant did feel that perhaps daily, even brief video-calls may  
568 have helped to feel more closely connected, as was the experience of their  
569 colleague above. Two other participants had had a mostly remote mentoring  
570 relationship (following an initial period getting to know each other in person) and  
571 described their experience from reciprocal viewpoints. They were in contact  
572 multiple times per day and video-called daily. The mentor was very available,  
573 and this supported a sense of closeness and connectedness that overcame the  
574 distance, such that it felt nearly as though the mentor was present. Inconsistent  
575 quality and reliability of internet connection in Timor-Leste, and time zone

576 differences, added an extra layer of challenge for participants engaging in  
577 remote mentorship to overcome the sense of distance and communicate  
578 effectively.

579

580 Theme 4: The mentoring relationship as dynamic and evolving, aligned to  
581 a shared vision and shared goals.

582 Participants spoke of the mentoring relationship needing to be dynamic and  
583 evolving as their skills and needs changed.

584 *"If the person who comes to teach is based on the mapping that he will*  
585 *teach from A to C, but then the mentees who want to be taught their*  
586 *knowledge have reached D, does he have the initiative to teach from F*  
587 *onwards, or they will follow based on one that has been listed? So not*  
588 *limiting us when we want to develop, not limiting our development not*  
589 *feel like because he is the mentor and we do what he tells us to do. So,*  
590 *he gave us an opportunity.. we can developing ourselves and create our*  
591 *own idea." (P1)*

592 Mentors recognised the need to adjust their initial preconceptions and  
593 expectations, and to change their approach and goals to fit the needs and  
594 context, not just initially, but along the whole journey.

595 *"Part of that is a model of also adjusting to what you see on the ground..*  
596 *what was probably of significant benefit... was (to) just sit and soak up..*  
597 *and then adjust a bit.. I would have envisioned doing x and more doing y..*

598 *adjusting more what we were focussing on.. other topics that were not*  
599 *necessarily high on my agenda going in.” (P22)*

600

601 From initial periods of listening and observation, identifying gaps and areas for  
602 improvement and developing shared goals, participants described how the  
603 relationship changed as it progressed through stages of building motivation,  
604 understanding the ‘why’ and ‘how’, modelling practice and then gradual  
605 advancement in skill toward competent and then independent practice, with  
606 changes in the level of supervision required. One mentor described the process  
607 of mentoring scientists to perform a complicated laboratory technique to a high  
608 quality assured standard.

609 *“You don't expect people to learn in the first or second day you know,*  
610 *they take time to change the habit, take time to change the practice.*  
611 *Don't just say 'I think you've been working on this the last five years. I*  
612 *think you know this'. That's it, we miss in between. We missed the steps.*  
613 *Slowly showing people instead is the key. Like when we did (it). So he*  
614 *sat down, he did it. I sat down, I did it and compare our results. And*  
615 *takes time.. now they stand on their own now, now we can just stand*  
616 *here and they'll do it.” (P23)*

617

618 A very strong theme from both mentors and local counterparts, was the  
619 importance of a shared vision and shared goals, being aligned in a desire to  
620 achieve the same things. Shared vision and shared goals were necessary  
621 between mentor and local counterpart, but were also described by both sets of

622 participants with respect to seeing their personal goals align with those of  
623 Menzies, as an organisation with which their work was involved. Both mentors  
624 and counterparts linked this with their internal motivations and described strong  
625 altruistic reasons for pursuing their line of work, for pursuing further learning and  
626 engaging with the opportunity to be involved in mentorship.

627

628 Many Timorese participants spoke of a deep motivation to serve their country  
629 and people, wanting to improve Timor-Leste, and bring dignity to the Timorese  
630 people through their work.

631 *“What’s motivated me is we can see the process how to help people that*  
632 *[are] sick. What is more important is we can help them. We can give the*  
633 *good results so then we can give a good treatment to the patients.*  
634 *Because in 2006 when the crisis (conflict) was stopped, at that time at*  
635 *first it was only to answer the need in our country when they said there*  
636 *were no analysts, in laboratory and also in districts. So why they open*  
637 *the school and we enrolled. (P7)*

638

639 A common vision, described in participant interviews and clearly articulated in  
640 participant group meetings, was that capacity building work should actively  
641 avoid setting up a situation of dependence. Participants (both Australian and  
642 Timorese) expressed a strong desire for Timorese to become independent in  
643 their practice, in terms of competency to perform tasks independently, and in  
644 leadership. Participants referred to the possibility of dynamic and evolving  
645 mentoring relationships, which can support a transition to independence. One

646 participant described this eloquently as a progression via small steps from  
647 standing alongside, to standing behind, to not being needed.

648 *“I know it's small, ah.. he spends time in there every day with the team,*  
649 *and look at them now. Like [x] stood on her own. I know that she still*  
650 *needs help, but they're, they're doing a lot of work in pandemic response.*  
651 *And look at micro now. I don't need to be there. And I know that [x] can*  
652 *deliver, [x] can deliver and others, others can deliver too...” (P23)*

653

654 Participants expressed their appreciation when there was an explicitly shared  
655 goal of establishing independent practice. As the mentoring relationships had  
656 evolved over time, a number of Timorese participants actively expressed a  
657 desire to move toward more distanced support, and to take the lead themselves.

658 *“I think their presence here... is very helpful. But on the other hand, we*  
659 *don't have to depend on them forever. It is important because it doesn't*  
660 *mean that we ourselves are not capable.. because one day we can. Do*  
661 *everything ourselves. There are things that we can do, we can decide for*  
662 *ourselves. For example, as now they have provided training for our*  
663 *infectious diseases doctor, our infectious diseases doctors are like our*  
664 *two friends. So far, we really need a line of people who know a little*  
665 *about microbiology, and the patients, and if these people are well trained,*  
666 *lab technicians can also make decisions in the lab even though they still*  
667 *need mentors from a distance. I think at times, we need [mentors].. we*  
668 *can do everything ourselves even though we still need them to still*  
669 *accompany.. from afar. However, in my opinion, if in the future, if we*



670 *already have the best capacity ... I think we are holding in a distance like*  
671 *the mentorship.. but I think it still needs time.” (P8)*

672 Developing this shared vision represented respect, interest and investment in  
673 the individual. Those who were able to link their internal motivation with their  
674 goals from the mentoring relationship found this very motivating and powerful  
675 (Figure 2, interview excerpt).

*We started with an objective that.. we provide treatment with quality, and dignify patients.*

*We are like.. one of the Menzies objectives is to improve... the process of laboratory test in order (that) the population who come have good treatment, the right medications.*

*There is an idea that in the future, [when] Menzies program finished, the sequel is still there. We also become mentor. They really want us to learn. They really want us to know because what they want is “after we leave you, you can work alone.”*

*“You work with us”, he told this to me... “we will make you to be a world class scientist.” He said it to me. I was very happy with this word. I still remember it...*

*I believe that in the future it will be good.*

*I am like a kernel of corn that people put in the frying pan and stir them up. Stir up in the frying pan. This what currently I feel in Menzies. Because, if I am like kernel of corn, I have been mixed with the intelligent people, when the corn is cooked, means that we are matured to it.*

*I want Menzies’ existence in Timor-Leste extended so that can create more environment like this so that the Timorese who have little knowledge in health area can learn in a proper manner, so that in the future we can be better. (P2)*

676

677 *Fig 2. Interview excerpt from a Timorese participant on their personal motivations and a shared vision*  
678 *aligned with their mentor and the organisation.*

679

680 Participants were frank about the impact of individuals and organisations where  
681 respect for Timorese leadership, capacity and vision of a pathway toward  
682 independent practice was not demonstrated. One participant described a  
683 previous experience in a different program in these terms.

684           *“And even some people even talk, and I overheard, and even in front of*  
685           *me, like Timor is the easy way to make money because you can just*  
686           *write and copy, paste, and that's it. Nobody's checking your report.*  
687           *Because people exploiting the weakness of our institution, none writing*  
688           *technical reports, which the directors won't even read. Now, I don't want*  
689           *that to happen to my people.” (P23)*

690

691   Another shared goal was for Timorese participants to move from being mentee  
692   to becoming a mentor themselves. There was recognition of the long-term,  
693   sustained change the process enabled, and the potential ripple effect this could  
694   have upon others. A number of Timorese participants already identified with  
695   both a mentee and mentor role.

696           *“I define mentees as a learning process to be a good mentor.*

697           *“What I learned from what he mentored me and what I learned from him,*  
698           *that I taught to other colleagues in the laboratory.” (P9)*

699

700   Thus dependence and independence were spoken about in terms of task  
701   performance but also with reference to Timorese people assuming leadership,  
702   taking charge of decision making, and mentoring others. It was important that  
703   this was an explicitly shared vision between mentor, local counterpart, and the  
704   organisation, and was of particular importance given the country's history of  
705   colonisation and struggle for independence. Some saw the continued influence

706 of external partners, dominating decision-making by the government as a  
707 continuation of external control.

708

## 709 Discussion

710 The key finding from this study was the importance to participants of connection  
711 and trust in the mentoring relationship itself. Side-by-side accompaniment was  
712 crucial to development of the relationship, to obtaining a detailed understanding  
713 of specific needs and contextual factors, and to be able to provide direct and  
714 immediate support and iterative learning in a way that was respectful and  
715 founded in genuine care. Participants saw value in a personalised, tailored  
716 approach to mentorship, responsive to the needs and strengths of each  
717 individual. Our research highlights that a good mentoring relationship was one  
718 that was individualised, dynamic and evolved with participants' changing needs  
719 over time. Participants recognised the influence of structural limitations in the  
720 broader environment in which mentorship was conducted on what could be  
721 achieved. Cross-cultural mentoring relationships benefited from a shared vision  
722 and goal of independent practice, of particular significance given Timor-Leste's  
723 history of colonisation and struggle for sovereign independence. The cross-  
724 cultural nature of the mentoring relationship and how this was managed was a  
725 critical thread, relevant across all themes.

726

727 The mentoring relationship provided a basis from which deep engagement and  
728 deep learning could take place. Observations regarding the key components of

729 an effective mentoring relationship were consistent with previous descriptions in  
730 the literature - open communication and accessibility; goals and challenges;  
731 passion and inspiration; caring personal relationship; mutual respect and trust;  
732 exchange of knowledge; independence and collaboration; and role modelling  
733 (36,37).

734 We had designed our program of capacity building and health system  
735 strengthening work around mentorship as a core component of the theory of  
736 change, relying on the transfer of skills and knowledge from mentor to their local  
737 counterparts. However, the value of connection in the relationship itself was  
738 more significant to participants than we had anticipated. This was highlighted by  
739 the quote “*nothing without connection*”. The need for strong trust and  
740 connection was even more important in the cross-cultural context; and it was  
741 clear that this had to develop over time, and was dependent on a period of in-  
742 country presence and the personal characteristics of the mentor.

743

744 The potential tensions between mentoring and supervisory roles are well  
745 recognised (38,39). Assuming responsibility for program oversight, and  
746 monitoring of quality or performance (traditional supervision) can confound the  
747 mentoring relationship, and tip the balance from a supportive and encouraging  
748 environment to one of monitoring and checking (39). Where possible, having  
749 two different people act in the mentor and supervisor roles can relieve this  
750 conflict (40). However, in many resource-constrained settings, limitations of  
751 human resources can mean that one individual holds dual roles. In Schwerdtle,  
752 Morphet and Hall’s model of mentorship, mentorship can be seen as ‘adding’ an

753 additional element of support above and beyond supervision and supportive  
754 supervision (2). Our findings add an extra dimension to this understanding,  
755 showing that in practice, the dual mentor/supervisor may hold shifting positions  
756 from encouraging and working ‘alongside’, to enforcing rules or managing  
757 performance as the ‘superior’. In these situations, it becomes all the more vital  
758 to maintain a strong connection and open communication to hold this duality of  
759 roles well and balance the nature of interactions toward the former rather than  
760 latter position.

761

762 The style of mentorship participants described as ‘*akompañã*’, learning side-by-  
763 side accompanied by one’s mentor, was also illustrative of a number of teaching  
764 and learning theories in practice, including situated learning (41), intentional  
765 change theory (42), and the ‘zone of proximal development’ in Vygotsky’s  
766 sociocultural theory of learning (43). Participants described the benefits of the  
767 apprenticeship model of learning, ‘situated’ in the workplace and learning  
768 through application and adaptation of theoretical knowledge and skills to real  
769 life problems (41). A number of Timorese participants described their personal  
770 experience of progress and development through mentorship in words that  
771 paraphrase intentional change theory which describes the conscious  
772 undertaking to develop a personal vision or goal, identify gaps between one’s  
773 current and ideal self, make a plan to move between the two, actively apply  
774 oneself to practice, and maintain relationships with people to support you to get  
775 there (42). The close ‘*akompañã*’ relationship between mentor and their local  
776 counterpart, gave mentors opportunity to observe, assess and then regularly

777 adjust their teaching to their counterpart's needs and level of ability. This  
778 resonates with Vygotsky's concept of teaching to the 'zone of proximal  
779 development', a space just outside of a learner's existing capacity and thus the  
780 next natural step for advancement, where they are both challenged and  
781 supported (43). Danoz's description of mentorship also uses the intersection  
782 between grades of challenge and support to illustrate how optimal growth can  
783 occur through mentorship (22). Participants described a process of graded  
784 development of competency through different stages of learning, with an  
785 inverse correlation to the level of direct/indirect supervision required (44). The  
786 end goal of mastery and independent practice was associated in our case with  
787 a desire from Timorese participants to shift roles and be able to provide the  
788 same mentorship to others.

789

790 The model of side-by-side mentorship (accompaniment) as described by our  
791 participants and the educational literature is less well represented in the global  
792 health literature. Programs of situated, side-by-side mentorship exist in global  
793 health but are not the dominant model (2). Anecdotally, a number of non-  
794 governmental organisations do engage in models of situated side-by-side  
795 mentorship, but their evaluation reports tend to remain confidential internal  
796 documents for donors, and articles in the peer-reviewed literature are limited  
797 (3,4,13). Discussion in the global health literature on human resource capacity  
798 building tends to focus on achieving performance of specific task competencies  
799 and thus leans more toward supervision, supportive supervision and training  
800 rather than weighting the value of the relationship. Even when the term mentor

801 is used, often interventions themselves are focused on transfer of knowledge  
802 and skills without also having a focus on the needs and goals for professional  
803 development of the individual (2,45). The concept of '*akompañã*' requires of the  
804 relationship something that extends beyond the focus areas of a particular  
805 project, or even the limited timeframe for which guidance is required. A  
806 relationship of accompaniment implies an ongoing closeness and trust, and a  
807 connection that might be expected to remain beyond the life of the project.

808

809 A number of participants spoke of structural barriers within their environment,  
810 outside of the mentoring relationship, related to government, finances and the  
811 political landscape, and limitations of the donor funding model; challenges that  
812 are recognised globally and also specifically in the Timor-Leste context, in  
813 building human resource capacity in health (46–50). In both interviews and  
814 group discussions, the importance of investments that address both human  
815 resources and training, and infrastructure and equipment, was highlighted, to  
816 enable participants to put skills into practice, and avoid a situation where  
817 system barriers overshadow any potential gains from mentorship and training  
818 (24,51–53).

819

820 In our study, the timing of the COVID pandemic facilitated a transition towards  
821 independence through relocation of mentors and forced indirect supervision; the  
822 varied reactions to this change depended on the strength of the pre-existing  
823 relationship and individual levels of competence and readiness for the change.  
824 It also provided opportunities for Timorese mentors to assume leadership roles

825 in Timor-Leste, with expanded scope of influence and opportunities to mentor  
826 multiple individuals. They were an example of local leadership and were  
827 inspirational mentors to many; their input was essential to the national health  
828 system's public health and laboratory response to COVID-19, and their  
829 leadership exemplified the theme of a shared vision for Timorese independence  
830 that was identified in this research (34).

831

832 We found that participants' understanding of good mentorship aligned  
833 particularly strongly with the concepts of transformational teaching and  
834 transformational leadership. Transformational teaching and leadership  
835 promotes an approach to learning that is linked with deep internal drivers, which  
836 can be more powerful than external incentives in motivating change and  
837 stimulating deep (rather than superficial) learning (54). Timorese participants  
838 spoke of their internal motivators: their desires to learn and improve in order to  
839 better serve their country and people, their desires to excel and progress in their  
840 careers, to perform their roles independently, and to lead and become mentors  
841 to others. The mentors, both Timorese and Australian, described having these  
842 same goals for those they worked alongside. Both parties (mentors and their  
843 counterparts) described a process of accompaniment on a path toward a  
844 shared vision, and described a strong drive in their work when their internal  
845 motivators aligned with the goals of mentorship. This kind of alignment is also  
846 discussed in the organisational culture literature, where individuals who feel that  
847 their aspirations align with those of the organisation, especially when this  
848 happens in a bottom-up approach, are motivated by this in their work. Senge



849 defines shared vision as “the capacity to hold a shared picture of the future we  
850 seek to create. When there is a genuine vision, people excel and learn not  
851 because they are told to, but because they want to” (55). This type of support  
852 stands in contrast to other experiences described by participants, of people in  
853 leadership positions holding onto ‘knowledge as power’. And for many, these  
854 contrasting experiences have motivated a desire to share this approach to  
855 mentorship with others.

856

### 857 [Cross-cultural dynamics](#)

858 Our findings build on what was already known, to show that the concept of  
859 mentorship along with other theories of teaching and learning can translate  
860 across cultures (56), and from the educational literature to the global health  
861 capacity building context. The descriptions given by participants derived from  
862 their lived experience of mentoring relationships rather than learnt definitions of  
863 theories of mentorship from the literature. It was reassuring to see that our  
864 conceptualisation of mentorship in program design had largely been realised in  
865 the implementation, and the principles of effective mentorship had carried  
866 through. It was evident however, that some participants had had variable and  
867 less positive experiences, sometimes related to external factors and at other  
868 times related to factors exerting influence within the mentoring relationship - the  
869 ‘fit’ between mentor and local counterpart, personal attributes relevant to  
870 adapting to work in a lower resource setting, communication style, and  
871 language. There were personal characteristics that were noted as  
872 advantageous to providing mentorship in a cross-cultural setting. Patience,

873 flexibility, adaptability, and the ability to observe and listen (rather than jump in  
874 with an opinion or a fix) were attributes emphasised more by our participants  
875 than in previous literature (25,26,36,37,57,58).

876

877 Though the concepts of mentorship translated across settings, cross-cultural  
878 and contextual differences highlight the need for bidirectional learning and in  
879 particular, recognition of the cultural mentorship that participants from a  
880 receiving country provide. The concept of cultural mentorship is one that has  
881 recently gained more prominence, used in Australia particularly in reference to  
882 engaging with Aboriginal and Torres Strait Islander peoples, and respecting  
883 Indigenous knowledge (59). Cultural mentorship in the health care setting has  
884 been used to build greater understanding of cultural context of the local  
885 community, and to support practitioners to provide culturally safe clinical  
886 practice, that benefits both the practitioner and the local community (59,60). For  
887 Timorese participants in this study, providing cultural mentorship allowed them  
888 to optimise the relationship and their own learning opportunities, by giving  
889 mentors an appreciation of context, and awareness of how and why they would  
890 need to adapt their usual practice, behaviour and communication; mentors in  
891 turn were challenged and extended by needing to apply their expertise in new  
892 ways and to reconsider their approach.

893

#### 894 [A decolonising lens](#)

895 Understanding participants' experiences through a decolonising lens (61–63)  
896 gives additional perspective to participants' reflections that for Timorese people,

897 'we don't like to be ordered about or told what to do', and of the resistance of  
898 inaction when subjugated or disrespected, saying 'yes, yes' but choosing not to  
899 follow through with a plan that does not include shared aims. It was noted that  
900 there was a hierarchy sometimes implicit, sometimes overt, of deferring to a  
901 non-Timorese. Recalling the quote of one participant who bemoaned money  
902 spent on fly-in fly-out international technical advisors and copy-paste technical  
903 reports, participants were dismayed to see practices they perceived as blatantly  
904 taking advantage of their country, and of the ongoing injustice of people telling  
905 others what they should be doing in their own country.

906

907 The decolonisation of global health has gained traction in the global health  
908 space over recent years, "a movement that fights against ingrained systems of  
909 dominance and power in the work to improve the health of populations, whether  
910 this occurs between countries, including between previously colonising and  
911 plundered nations, and within countries" (64). The concept of global health  
912 emerged in response to disproportional health needs between low and high  
913 income countries due to resource inequity. However, this positively framed  
914 narrative belies the reality that this disparity often exists because of a history of  
915 colonisation and exploitation of peoples, states and their resources (65), and an  
916 increasing realisation that "the operations of many organisations active in global  
917 health... perpetuate the very power imbalances they claim to rectify, through  
918 colonial and extractive attitudes, and policies and practices that concentrate  
919 resources, expertise, data and branding within high-income country (HIC)  
920 institutions" (64).

921 In undertaking this study, and associated work in Timor-Leste, we are mindful of  
922 the importance of decolonisation in our own setting, in our individual  
923 interactions and also in the systems and processes that institutionalise power  
924 imbalances, that we have power to influence and rectify. The findings of this  
925 study give us opportunity to reflect, and further commit to a deliberate,  
926 decolonising approach to our work in Timor-Leste. As Timorese and non-  
927 Timorese leaders within our organisation, it is essential that we listen, creating  
928 spaces where honest conversations can happen, that we recognise privilege,  
929 and acknowledge where things may not have been done the best way,  
930 accepting the discomfort this brings, while we work to shift power balances (64).  
931 As we look to continue creating and maintaining mentoring relationships as part  
932 of our work, mentors should work alongside local counterparts, supporting  
933 progression to independence and leadership, rather than position themselves  
934 for exertion of authority. This adds an extra layer of complexity in instances  
935 where mentors also hold supervisory roles. Hopefully, the mentorship of local  
936 Timorese into positions of leadership, alongside ongoing respectful partnerships  
937 for capacity building and health system strengthening, can contribute to this  
938 goal (66).

939

## 940 [Limitations](#)

941 There were limitations to our study. The dual roles of researchers on this study  
942 also working within the Menzies program of work could have contributed to a  
943 sense of coercion to participate, positive bias in participant responses, and/or  
944 positively biased selection or interpretation of data in favour of reporting good

945 participant experiences of mentorship. However, participants were frank in their  
946 responses and gave both positive and negative feedback; a number of  
947 interviews ran overtime due to participants wanting to continue adding more  
948 reflections, and the group discussions were lively. Participants were a self-  
949 selected group who volunteered to participate. Many had close interactions with  
950 the program and through their mentoring relationships, were known to the  
951 researchers and may have been more likely to provide positive responses. We  
952 made efforts to counter the potential for unconscious bias in thematic analysis  
953 with a participatory process, member checking, involving participants in revising  
954 and refining themes and reinforcing concepts of importance to the participants.  
955 Some interviews were conducted remotely via videocall rather than in-person.  
956 The COVID pandemic interrupted progress on the research study and so some  
957 interviews were conducted at different time points through the transition  
958 between in-person and periods of remote mentorship, that could have  
959 influenced participant's feelings about their experience.

960

## 961 Conclusions

962 This study builds on limited published literature regarding mentorship  
963 approaches to capacity building in global health settings. Capacity building  
964 programs that focus on knowledge and skills transfer without broader  
965 considerations of teaching and learning theory and the individual needs of  
966 participants, can lead to interventions that are efficient to deliver but may result  
967 in superficial learning, poor engagement, slow transition to independent practice,  
968 and limited long-term sustainable change. Global health human resource

969 capacity building programs should consider incorporation of the concept of  
970 accompaniment (akompañá) into program design, with a focus on development  
971 of trusting, long-term, side-by-side mentoring relationships, which prioritise  
972 development of a shared vision of professional goals.

973

## 974 References

- 975 1. Vasan A, Mabey DC, Chaudhri S, Epstein HAB, Lawn SD. Support and  
976 performance improvement for primary health care workers in low- and  
977 middleincome countries: A scoping review of intervention design and  
978 methods. Vol. 32, Health Policy and Planning. Oxford University Press;  
979 2017. p. 437–52.
- 980 2. Schwerdtle P, Morphet J, Hall H. A scoping review of mentorship of health  
981 personnel to improve the quality of health care in low and middle-income  
982 countries. Global Health. 2017 Oct 3;13(1):77.
- 983 3. Manzi A, Magge H, Hedt-Gauthier BL, Michaelis AP, Cyamatare FR,  
984 Nyirazinyoye L, et al. Clinical mentorship to improve pediatric quality of  
985 care at the health centers in rural Rwanda: a qualitative study of  
986 perceptions and acceptability of health care workers. BMC Health Serv  
987 Res [Internet]. 2014 Jun 20 [cited 2020 Jun 30];14(1):275. Available from:  
988 <http://www.ncbi.nlm.nih.gov/pubmed/24950878>
- 989 4. Catton HN. Developing a mentorship program in Laos. Front Public Heal.  
990 2017;5(6):145.

- 991 5. Decorby-Watson K, Mensah G, Bergeron K, Abdi S, Rempel B, Manson H.  
992 Effectiveness of capacity building interventions relevant to public health  
993 practice: A systematic review. Vol. 18, BMC Public Health. BioMed  
994 Central Ltd.; 2018. p. 684.
- 995 6. Manzi A, Hirschhorn LR, Sherr K, Chirwa C, Baynes C, Awoonor-Williams  
996 JK, et al. Mentorship and coaching to support strengthening healthcare  
997 systems: Lessons learned across the five Population Health  
998 Implementation and Training partnership projects in sub-Saharan Africa.  
999 BMC Health Serv Res. 2017 Dec 21;17.
- 1000 7. Magge H, Anatole M, Cyamatare FR, Mezzacappa C, Nkikabahizi F,  
1001 Niyonzima S, et al. Mentoring and quality improvement strengthen  
1002 integrated management of childhood illness implementation in rural  
1003 Rwanda. Arch Dis Child [Internet]. 2015 Jun 1 [cited 2020 Jun  
1004 30];100(6):565–70. Available from:  
1005 <http://www.ncbi.nlm.nih.gov/pubmed/24819369>
- 1006 8. Feyissa GT, Balabanova D, Woldie M. How Effective are Mentoring  
1007 Programs for Improving Health Worker Competence and Institutional  
1008 Performance in Africa? A Systematic Review of Quantitative Evidence. J  
1009 Multidiscip Healthc [Internet]. 2019 [cited 2020 Jun 30];12:989–1005.  
1010 Available from: <http://www.ncbi.nlm.nih.gov/pubmed/31824166>
- 1011 9. Reddy P, Desai R, Sifunda S, Chalkidou K, Hongoro C, Macharia W, et al.  
1012 “You Travel Faster Alone, but Further Together”: Learning From a Cross  
1013 Country Research Collaboration From a British Council Newton Fund  
1014 Grant. Int J Heal policy Manag. 2018 Nov;7(11):977–81.

- 1015 10. Kennedy HP, Stalls S, Kaplan LK, Grenier L, Fujioka A. Thirty years of  
1016 global outreach by the American College of Nurse-Midwives. *MCN Am J*  
1017 *Matern Child Nurs.* 2012 Sep;37(5):290–7.
- 1018 11. Matovu J, Wanyenze R, Mawemuko S, Okui O, Bazeyo W, Serwadda D.  
1019 Strengthening health workforce capacity through work-based training.  
1020 *BMC Int Health Hum Rights.* 2013;13(8).
- 1021 12. Guest GD, Scott DF, Xavier JP, Martins N, Vreede E, Chennal A, et al.  
1022 Surgical capacity building in Timor-Leste: a review of the first 15 years of  
1023 the Royal Australasian College of Surgeons-led Australian Aid  
1024 programme. *ANZ J Surg.* 2017 Jun 1;87(6):436–40.
- 1025 13. Watters DA, McCaig E, Nagra S, Kevau I. Surgical training programmes  
1026 in the South pacific, Papua new Guinea and timor leste. Vol. 106, *British*  
1027 *Journal of Surgery.* John Wiley and Sons Ltd; 2019. p. e53–61.
- 1028 14. Forsetlund L, Bjørndal A, Rashidian A, Jamtvedt G, O'Brien MA, Wolf F,  
1029 et al. Continuing education meetings and workshops: effects on  
1030 professional practice and health care outcomes. *Cochrane database Syst*  
1031 *Rev [Internet].* 2009 [cited 2023 Mar 4];2009(2). Available from:  
1032 <https://pubmed.ncbi.nlm.nih.gov/19370580/>
- 1033 15. Knowles MS (Malcolm S, Holton EF, Swanson RA. *The adult learner* □:  
1034 the definitive classic in adult education and human resource development  
1035 [Internet]. Elsevier; 2011 [cited 2018 May 13]. 406 p. Available from:  
1036 [https://eds-a-ebSCOhost-](https://eds-a-ebSCOhost-com.ezp.lib.unimelb.edu.au/eds/detail/detail?vid=13&sid=3ce17dfb-7912-4ea6-8441-)  
1037 [com.ezp.lib.unimelb.edu.au/eds/detail/detail?vid=13&sid=3ce17dfb-7912-](https://eds-a-ebSCOhost-com.ezp.lib.unimelb.edu.au/eds/detail/detail?vid=13&sid=3ce17dfb-7912-4ea6-8441-)  
1038 [4ea6-8441-](https://eds-a-ebSCOhost-com.ezp.lib.unimelb.edu.au/eds/detail/detail?vid=13&sid=3ce17dfb-7912-4ea6-8441-)



- 1039 1529df601e18%40sessionmgr4009&bdata=JnNpdGU9ZWRzLWxpdmUm  
1040 c2NvcGU9c2l0ZQ%3D%3D#AN=edshlc.013360334-2&db=edshlc
- 1041 16. Kok MC, Dieleman M, Taegtmeyer M, Broerse JEW, Kane SS, Ormel H,  
1042 et al. Which intervention design factors influence performance of  
1043 community health workers in low- and middle-income countries? A  
1044 systematic review. *Health Policy Plan*. 2015 Nov 1;30(9):1207–27.
- 1045 17. Hill Z, Dumbaugh M, Benton L, Källander K, Strachan D, ten Asbroek A,  
1046 et al. Supervising community health workers in low-income countries--a  
1047 review of impact and implementation issues. *Glob Health Action*.  
1048 2014;7:24085.
- 1049 18. Pariyo GW, Gouws E, Bryce J, Burnham G. Improving facility-based care  
1050 for sick children in Uganda: training is not enough. *Health Policy Plan*  
1051 [Internet]. 2005 [cited 2023 Mar 4];20 Suppl 1(SUPPL. 1). Available from:  
1052 <https://pubmed.ncbi.nlm.nih.gov/16306071/>
- 1053 19. Workneh G, Scherzer L, Kirk B, Draper HR, Anabwani G, Wanless RS, et  
1054 al. Evaluation of the effectiveness of an outreach clinical mentoring  
1055 programme in support of paediatric HIV care scale-up in Botswana. *AIDS*  
1056 *Care - Psychol Socio-Medical Asp AIDS/HIV* [Internet]. 2013 Jan 1 [cited  
1057 2020 Jun 30];25(1):11–9. Available from:  
1058 <https://pubmed.ncbi.nlm.nih.gov/22533352/>
- 1059 20. Rowe AK, Rowe SY, Peters DH, Holloway KA, Chalker J, Ross-Degnan D.  
1060 Effectiveness of strategies to improve health-care provider practices in  
1061 low-income and middle-income countries: a systematic review. *Lancet*  
1062 *Glob Heal*. 2018 Nov;6(11):e1163–75.

- 1063 21. Short J, McDonald S, Turner T, Martis R, SEA-ORCHID Study Group.  
1064 Improving capacity for evidence-based practice in South East Asia:  
1065 evaluating the role of research fellowships in the SEA-ORCHID Project.  
1066 BMC Med Educ. 2010 May 22;10(1):37.
- 1067 22. Daloz L. Effective teaching and mentoring: Realizing the Transformational  
1068 Power of Adult Learning Experiences. Jossey-Bass; 1986. 256 p.
- 1069 23. Mezirow J. Fostering Critical Reflection in Adulthood: A Guide to  
1070 Transformative and Emancipatory Learning. San Francisco: Jossey-Bass;  
1071 1990.
- 1072 24. Morgan MC, Dyer J, Abril A, Christmas A, Mahapatra T, Das A, et al.  
1073 Barriers and facilitators to the provision of optimal obstetric and neonatal  
1074 emergency care and to the implementation of simulation-enhanced  
1075 mentorship in primary care facilities in Bihar, India: a qualitative study.  
1076 BMC Pregnancy Childbirth. 2018 Oct;18(1):420.
- 1077 25. Whitehurst JL, Rowlands J. Helping palliative care healthcare  
1078 professionals get the most out of mentoring in a low-income country: a  
1079 qualitative study. BMC Palliat Care [Internet]. 2016 Nov 4 [cited 2020 Jun  
1080 28];15(1):90. Available from: [https://pubmed-ncbi-nlm-nih-](https://pubmed-ncbi-nlm-nih-gov.www.ezpdhcs.nt.gov.au/27809819/)  
1081 [gov.www.ezpdhcs.nt.gov.au/27809819/](https://pubmed-ncbi-nlm-nih-gov.www.ezpdhcs.nt.gov.au/27809819/)
- 1082 26. Parekh N, Sawatsky AP, Mbata I, Muula AS, Bui T. Malawian impressions  
1083 of expatriate physicians: A qualitative study. Malawi Med J. 2016  
1084 Jun;28(2):43–7.
- 1085 27. Beckett A, Fowler R, Adhikari N, Hawryluck L, Razek T, Tien H. Medical

- 1086 mentorship in Afghanistan: How are military mentors perceived by Afghan  
1087 health care providers? *Can J Surg* [Internet]. 2015 Jun 1 [cited 2020 Jun  
1088 30];58(3):S98–103. Available from:  
1089 [/pmc/articles/PMC4467500/?report=abstract](#)
- 1090 28. Finley GA, Forgeron P, Arnaout M. Action Research: Developing a  
1091 Pediatric Cancer Pain Program in Jordan. *J Pain Symptom Manage*  
1092 [Internet]. 2008 Apr 1 [cited 2020 Jun 30];35(4):447–54. Available from:  
1093 <http://www.jpmsjournal.com/article/S0885392407007361/fulltext>
- 1094 29. Government of Timor-Leste. Timor-Leste History [Internet]. [cited 2020 Jul  
1095 1]. Available from: <http://timor-leste.gov.tl/?p=29&lang=en>
- 1096 30. United Nations Development Programme. Human Development Report  
1097 2021/2022. Uncertain Times, Unsettled Lives: Shaping our Future in a  
1098 Transforming World [Internet]. New York; 2022 [cited 2022 Nov 5].  
1099 Available from: [https://hdr.undp.org/system/files/documents/global-report-](https://hdr.undp.org/system/files/documents/global-report-document/hdr2021-22pdf_1.pdf)  
1100 [document/hdr2021-22pdf\\_1.pdf](https://hdr.undp.org/system/files/documents/global-report-document/hdr2021-22pdf_1.pdf)
- 1101 31. Mercer MA, Thompson SM, De Araujo RM. The role of international  
1102 NGOs in health systems strengthening: The case of timor-leste. *Int J Heal*  
1103 *Serv*. 2014 Jan 1;44(2):323–35.
- 1104 32. Sarmiento N, Oakley T, Silva ES da, Tilman A, Monteiro M, Alves L, et al.  
1105 Strong relationships between the Northern Territory of Australia and  
1106 Timor-Leste. *Microbiol Aust* [Internet]. 2022 Sep 27 [cited 2023 Jan  
1107 14];43(3):125–9. Available from:  
1108 <https://www.publish.csiro.au/ma/MA22039>

- 1109 33. Francis JR, Sarmento N, Draper ADK, Marr I, Ting S, Fancourt N, et al.  
1110 Antimicrobial resistance and antibiotic use in Timor-Leste: building  
1111 surveillance capacity with a One Health approach. *Commun Dis Intell*  
1112 [Internet]. 2020 Jan 15 [cited 2023 Jan 14];44. Available from:  
1113 <https://pubmed.ncbi.nlm.nih.gov/31940450/>
- 1114 34. Sarmento N, Soares da Silva E, Barreto I, Ximenes JC, Angelina JM,  
1115 Correia DM, et al. The COVID-19 laboratory response in Timor-Leste; a  
1116 story of collaboration. *Lancet Reg Heal Southeast Asia* [Internet]. 2023  
1117 Apr [cited 2023 Feb 20];11:100150. Available from:  
1118 <https://pubmed.ncbi.nlm.nih.gov/36744276/>
- 1119 35. Lincoln YS, Guba EG. What is Trustworthiness? In: *Naturalistic Inquiry*.  
1120 SAGE Publications; 1985. p. 291–4.
- 1121 36. Eller LS, Lev EL, Feurer A. Key components of an effective mentoring  
1122 relationship: a qualitative study. 2013;
- 1123 37. Hamer DH, Hansoti B, Prabhakaran D, Huffman MD, Nxumalo N, Fox MP,  
1124 et al. Global health research mentoring competencies for individuals and  
1125 institutions in low-and middle-income countries. *Am J Trop Med Hyg*.  
1126 2019;100:15–9.
- 1127 38. Ssemata AS, Gladding S, John CC, Kiguli S. Developing mentorship in a  
1128 resource-limited context: a qualitative research study of the experiences  
1129 and perceptions of the makerere university student and faculty  
1130 mentorship programme. *BMC Med Educ*. 2017 Jul 14;17(1):123.
- 1131 39. World Health Organisation. WHO | WHO recommendations for clinical

- 1132 mentoring to support scale-up of HIV care, antiretroviral therapy and  
1133 prevention in resource-constrained settings [Internet]. 2006 [cited 2020  
1134 Jun 30]. Available from:  
1135 <https://www.who.int/hiv/pub/meetingreports/clinicalmentoring/en/>
- 1136 40. Mellon A, Murdoch-Eaton D. Supervisor or mentor: Is there a difference?  
1137 Implications for paediatric practice. *Arch Dis Child*. 2015 Sep  
1138 1;100(9):873–8.
- 1139 41. Billett S. Situating Learning in the Workplace: Having Another Look at  
1140 Apprenticeships. *Ind Commer Train* [Internet]. 1994 [cited 2018 May  
1141 13];26(11):9–16. Available from: <http://hdl.handle.net/10072/11865>
- 1142 42. Boyatzis RE. An overview of intentional change from a complexity  
1143 perspective. *J Manag Dev*. 2006;25(7):607–23.
- 1144 43. Vygotskii □ LS (Lev S. *Mind in society □: the development of higher*  
1145 *psychological processes* [Internet]. Cambridge: Harvard University Press;  
1146 1978 [cited 2019 May 3]. 159 p. Available from:  
1147 <http://www.hup.harvard.edu/catalog.php?isbn=9780674576292>
- 1148 44. Griffin P. *Assessment for teaching*. Assessment for Teaching. Cambridge:  
1149 Cambridge University Press; 2018.
- 1150 45. Vasan A, Mabey D, Chaudhri S, Brown Epstein H, Lawn S. Support and  
1151 performance improvement for primary healthcare workers in low- and  
1152 middle-income countries: a scoping review of intervention design and  
1153 methods. *Health Policy Plan* [Internet]. 2017 [cited 2020 Jun 30];32(3).  
1154 Available from: <https://pubmed-ncbi-nlm-nih->

- 1155 [gov.www.ezpdhcs.nt.gov.au/27993961/](http://gov.www.ezpdhcs.nt.gov.au/27993961/)
- 1156 46. Cabral J, Dussault G, Buchan J, Ferrinho P. Scaling-up the medical  
1157 workforce in Timor-Leste: Challenges of a great leap forward. *Soc Sci*  
1158 *Med*. 2013 Nov;96:285–9.
- 1159 47. Ferrinho P, Valdes AC, Cabral J. The experience of medical training and  
1160 expectations regarding future medical practice of medical students in the  
1161 Cuban-supported Medical School in Timor-Leste. *Hum Resour Health*  
1162 [Internet]. 2015 Mar 28 [cited 2019 Nov 9];13(1):13. Available from:  
1163 <http://www.ncbi.nlm.nih.gov/pubmed/25880331>
- 1164 48. Hou X, Witter S, Zaman RU, Engelhardt K, Hafidz F, Julia F, et al. What  
1165 do health workers in Timor-Leste want, know and do? Findings from a  
1166 national health labour market survey. *Hum Resour Health* [Internet]. 2016  
1167 Nov 18 [cited 2020 Jun 16];14(1):69. Available from:  
1168 <http://www.ncbi.nlm.nih.gov/pubmed/27863499>
- 1169 49. Bertone MP, Martins JS, Pereira SM, Martineau T, Alonso-Garbayo A.  
1170 Understanding HRH recruitment in post-conflict settings: An analysis of  
1171 central-level policies and processes in Timor-Leste (1999-2018). *Hum*  
1172 *Resour Health* [Internet]. 2018 Nov 29 [cited 2022 Oct 16];16(1):1–12.  
1173 Available from: [https://human-resources-](https://human-resources-health.biomedcentral.com/articles/10.1186/s12960-018-0325-5)  
1174 [health.biomedcentral.com/articles/10.1186/s12960-018-0325-5](https://human-resources-health.biomedcentral.com/articles/10.1186/s12960-018-0325-5)
- 1175 50. Witter S, Falisse JB, Bertone MP, Alonso-Garbayo A, Martins JS, Salehi  
1176 AS, et al. State-building and human resources for health in fragile and  
1177 conflict-affected states: Exploring the linkages. Vol. 13, *Human*  
1178 *Resources for Health*. BioMed Central Ltd.; 2015.

- 1179 51. Sayed S, Cherniak W, Lawler M, Tan SY, El Sadr W, Wolf N, et al.  
1180 Improving pathology and laboratory medicine in low-income and middle-  
1181 income countries: roadmap to solutions. *Lancet* (London, England). 2018  
1182 May;391(10133):1939–52.
- 1183 52. Potter C, Brough R. Systemic capacity building: A hierarchy of needs.  
1184 *Health Policy Plan*. 2004;19(5):336–45.
- 1185 53. Heller DJ, Kumar A, Kishore SP, Horowitz CR, Joshi R, Vedanthan R.  
1186 Assessment of Barriers and Facilitators to the Delivery of Care for  
1187 Noncommunicable Diseases by Nonphysician Health Workers in Low-  
1188 and Middle-Income Countries: A Systematic Review and Qualitative  
1189 Analysis. *JAMA* [Internet]. 2019 Dec 2 [cited 2020 Jun  
1190 28];2(12):e1916545. Available from: [https://pubmed-ncbi-nlm-nih-  
1191 gov.www.ezpdhcs.nt.gov.au/31790570/](https://pubmed-ncbi-nlm-nih-gov.www.ezpdhcs.nt.gov.au/31790570/)
- 1192 54. Slavich GM, Zimbardo PG. Transformational Teaching: Theoretical  
1193 Underpinnings, Basic Principles, and Core Methods. *Educ Psychol Rev*  
1194 [Internet]. 2012 Dec [cited 2022 Oct 16];24(4):569–608. Available from:  
1195 <https://pubmed.ncbi.nlm.nih.gov/23162369/>
- 1196 55. Senge PM. *The fifth discipline: The art and practice of the learning*  
1197 *organization*. New York: Currency Doubleday; 1990. 191–215 p.
- 1198 56. Lescano AG, Cohen CR, Raj T, Rispel L, Garcia PJ, Zunt JR, et al.  
1199 Strengthening mentoring in low-and middle-income countries to advance  
1200 global health research: An overview. Vol. 100, *American Journal of*  
1201 *Tropical Medicine and Hygiene*. American Society of Tropical Medicine  
1202 and Hygiene; 2019. p. 3–8.

- 1203 57. Gandhi M, Raj T, Fernandez R, Rispel L, Nxumalo N, Lescano AG, et al.  
1204 Mentoring the mentors: Implementation and evaluation of four fogarty-  
1205 sponsored mentoring training workshops in low-and middle-income  
1206 countries. *Am J Trop Med Hyg* [Internet]. 2019 Nov 14 [cited 2020 Feb  
1207 18];100(Suppl 1):20–8. Available from:  
1208 <http://www.ajtmh.org/content/journals/10.4269/ajtmh.18-0559>
- 1209 58. Huybrecht S, Loeckx W, Quaeyhaegens Y, De Tobel D, Mistiaen W.  
1210 Mentoring in nursing education: Perceived characteristics of mentors and  
1211 the consequences of mentorship. *Nurse Educ Today*. 2011 Apr  
1212 1;31(3):274–8.
- 1213 59. General Practice Education and Training Limited AGD of H. Cultural  
1214 Educators and Cultural Mentors: Building trust and respect [Internet].  
1215 2014 [cited 2022 Oct 22]. Available from:  
1216 [https://aboriginalhealth.gpsynergy.com.au/wp-](https://aboriginalhealth.gpsynergy.com.au/wp-content/uploads/2021/03/CE_CM-Building-trust-and-respect_.pdf)  
1217 [content/uploads/2021/03/CE\\_CM-Building-trust-and-respect\\_.pdf](https://aboriginalhealth.gpsynergy.com.au/wp-content/uploads/2021/03/CE_CM-Building-trust-and-respect_.pdf)
- 1218 60. Reath J, Abbott P, Kurti L, Morgan R, Martin M, Parry A, et al. Supporting  
1219 aboriginal and Torres Strait islander cultural educators and cultural  
1220 mentors in Australian general practice education. *BMC Med Educ*. 2018  
1221 Oct 11;18(1).
- 1222 61. Thiong’O NW. Decolonising the mind. *Diogenes* [Internet]. 1998 Jul 26  
1223 [cited 2022 Nov 5];46(184):101–4. Available from:  
1224 <https://journals.sagepub.com/doi/abs/10.1177/039219219804618409>
- 1225 62. Fanon F. *Black Skin, White Masks* [Internet]. Grove Paperback; 2008  
1226 [cited 2022 Nov 5]. Available from: <https://groveatlantic.com/book/black->



- 1227 skin-white-masks/
- 1228 63. Gandhi L. Postcolonial theory□: a critical introduction [Internet]. Second  
1229 edition. Columbia University Press; 1998 [cited 2022 Nov 5]. 200 p.  
1230 Available from: [http://cup.columbia.edu/book/postcolonial-](http://cup.columbia.edu/book/postcolonial-theory/9780231112734)  
1231 [theory/9780231112734](http://cup.columbia.edu/book/postcolonial-theory/9780231112734)
- 1232 64. Khan M, Abimbola S, Aloudat T, Capobianco E, Hawkes S, Rahman-  
1233 Shepherd A. Decolonising global health in 2021: a roadmap to move from  
1234 rhetoric to reform. *BMJ Glob Heal* [Internet]. 2021 Mar 1 [cited 2022 Oct  
1235 17];6(3):e005604. Available from: <https://gh.bmj.com/content/6/3/e005604>
- 1236 65. Kwete X, Tang K, Chen L, Ren R, Chen Q, Wu Z, et al.  
1237 Decolonizing global health: what should be the target of this movement  
1238 and where does it lead us? *Glob Heal Res Policy* [Internet]. 2022 Dec 1  
1239 [cited 2022 Oct 17];7(1):1–6. Available from:  
1240 <https://ghrp.biomedcentral.com/articles/10.1186/s41256-022-00237-3>
- 1241 66. Mogaka OF, Stewart J, Bukusi E. Why and for whom are we decolonising  
1242 global health? *Lancet Glob Heal* [Internet]. 2021 Oct 1 [cited 2022 Oct  
1243 17];9(10):e1359–60. Available from:  
1244 <http://www.thelancet.com/article/S2214109X2100317X/fulltext>
- 1245
